# Supplementary material
Source: ML conference proceedings conference paper supplement (https://openaccess.thecvf.com/content/WACV2024/html/Fulari_Unsupervised_Model-Based_Learning_WACV_2024_paper.html)
Supplement: Supplementary file 1 [file Fulari_Unsupervised_Model-Based_Learning_WACV_2024_supplemental.pdf]

# Supplemental Material: Unsupervised Model-based Learning for Simultaneous Video Deflickering and Deblotching

Anuj Fulari, Satish Mulleti and Ajit Rajwade  
IIT Bombay, India

anujfulari@cse.iitb.ac.in, satish.mulleti@gmail.com, ajitvr@cse.iitb.ac.in

## 1. Contents

This document contains supplemental material for the main paper. The contents include:

1. Results on the guitar video referred to in the Experiments section of the main paper - see Sec. 2.
2. Some details regarding the procedure to implement LFISTA are included in Sec. 3.
3. An ablation study for LFISTA by varying the window-size  $W$  of the temporal smoothing process is presented in Sec. 4.
4. Quantitative results on synthetically generated videos with no-reference and full-reference quality measures are included in Sec. 5.
5. Quantitative results from Sec. 4 of the main paper are included in Sec. 7 for *each* video separately.
6. Quantitative comparisons between LFISTA and NFFA are presented in Sec. 6.
7. Qualitative Results (not in this document, but the accompanying video ‘*revised\_supplemental\_video\_542.mp4*’ available at the link <https://drive.google.com/file/d/1-a0akBb6YVCqZGtCfvTxKB78fCyguA39/view?usp=sharing>): This video shows restoration results on two videos each from the datasets  $D1$ ,  $D2$  and four videos (including one color video) from  $D3$ . The datasets  $D1$ ,  $D2$ ,  $D3$  are described in Sec. 4.1 of the main paper. In addition, we also show a result on the (self-acquired) guitar video. In the video file, results obtained using our LFISTA method are shown alongside the original (to be restored) video, as well as results obtained using RTN [7], DeepRemaster [2], OldPhoto [8] + TS [3] and NeatVideo. The superior performance of the proposed technique is very clear from the video results - from the point of view of flicker as well as blotch removal. Note that for all competing methods, we have used the code and parameter settings provided by the respective authors.

## 2. Results on Guitar Video

| Dataset | Method           | OFE1            | OFE2            | OFEF            |
|---------|------------------|-----------------|-----------------|-----------------|
| Guitar  | Original         | 0.021452        | 0.02017         | 0.067409        |
|         | OldPhoto + TS    | 0.02078         | 0.01998         | 0.07714         |
|         | DeepRemaster [2] | 0.019439        | 0.018503        | 0.04392         |
|         | RTN [7]          | 0.007589        | 0.008533        | 0.019989        |
|         | NeatVideo        | 0.016328        | 0.013719        | 0.054162        |
|         | LFISTA           | <b>0.003602</b> | <b>0.004247</b> | <b>0.008376</b> |

Table 1. Values of OFE1, OFE2, OFEF metrics (lower is better), computed on the Guitar video from Fig. 1, for various competing methods. In all videos, intensity range was [0, 1].

This is a result on the guitar video in Fig. 1. The video is gathered at 240 fps from a mobile phone and exhibits flicker artifacts. The numerical scores for different methods for this video are presented in Table 1. Please see the accompanying video file ‘*revised\_supplemental\_video\_542.mp4*’ for the restoration results in video format.

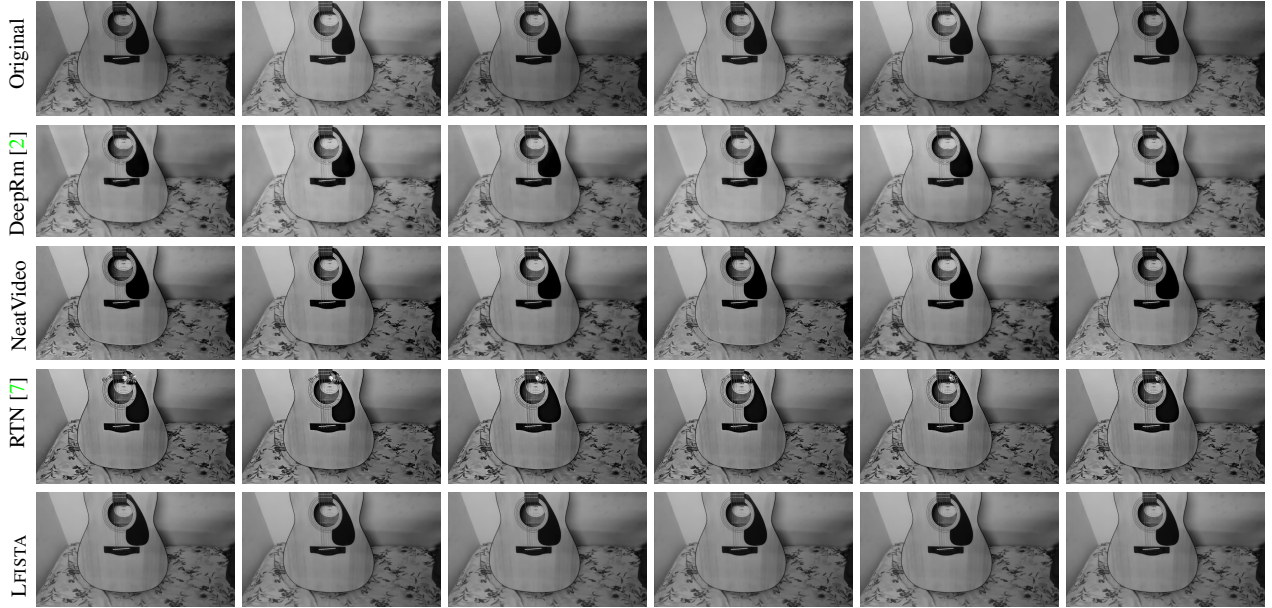

Figure 1. Comparison of deflickering performance of different methods on a high speed (240 fps) video gathered from a mobile phone. See accompanying video results, and numerical scores in Table 1.

|         | OFE1↓    | OFE2↓   | OFEP↓    | BRISQUE↓ | NIQE↓   |
|---------|----------|---------|----------|----------|---------|
| Orig.   | 0.01     | 0.01198 | 0.044    | 43.54    | 21.29   |
| $W = 1$ | 0.0102   | 0.0115  | 0.038    | 44.89    | 18.8877 |
| $W = 3$ | 0.0072   | 0.0091  | 0.0237   | 45.088   | 19.033  |
| $W = 5$ | 0.0062   | 0.008   | 0.022    | 45.294   | 19.037  |
| $W = 7$ | 0.005753 | 0.0075  | 0.021916 | 45.4     | 18.96   |
| $W = 9$ | 0.0055   | 0.0072  | 0.022    | 45.46    | 18.94   |

Table 2. Ablation study on the effect of temporal smoothing radius  $W$  on the LFISTA technique.

### 3. Details of the video used to train the network for LFISTA

Refer to Sec. 4.2 of the main paper. For implementing LFISTA, the network was trained (in an unsupervised manner) on patches of size  $32 \times 32$ , as opposed to entire frames in order to reduce the number of parameters being learned. The training patches were extracted from randomly selected pairs of frames from 52 good quality video clips extracted from the Youtube video at <https://www.youtube.com/watch?v=LXb3EKWsInQ> (converted to grayscale). In every pair, both the frames were located within a temporal neighborhood of radius  $W = 5$  from each other. The video clips were synthetically degraded by blotch artifacts with average diameter of 10 pixels. We emphasize that none of these video clips were part of the datasets  $D1-D3$  on which our algorithm was tested.

### 4. Ablation Study

We present an ablation study to determine the effect of the temporal smoothing radius  $W$  on our LFISTA technique. The results of this study are presented in Table 2. All experiments were carried out on 10 videos from the  $D3$  dataset. We generally observed that  $W = 5$  (i.e. 5 frames on either side of the reference frame) yielded the best results visually and hence used that value in our experiments. Larger values of  $W$  lowered the metric values as seen in the table, but caused slight blurring of moving object boundaries. This is due to errors in optical flow computed between distant frames (due to increase in  $W$ ). On the other hand, lower values of  $W$  did not sufficiently erase flicker or blotches.

| Method       | OFE1↓          | OFE2↓           | OFEP↓         | BRISQUE [5]↓ | NIQE [6]↓    | SM [1]↑     | SSIM↑         | PSNR↑           |
|--------------|----------------|-----------------|---------------|--------------|--------------|-------------|---------------|-----------------|
| Original     | 0.0144         | 0.015174        | 0.142124      | 26.61        | 18.59        | 1           | 0.924         | 25.56           |
| DeepRm [2]   | 0.011          | 0.0135          | 0.0899        | 31.81        | 18.84        | 1.23        | 0.92          | 25.86           |
| NeatVideo    | 0.006          | 0.008           | 0.0563        | 35.57        | 17.576       | 1.58        | 0.9086        | <b>27.03976</b> |
| RTN [7]      | 0.009          | 0.011           | 0.066         | <b>19.96</b> | 17.92        | 1.12        | 0.8529        | 24.386          |
| NFFA [4]     | <b>0.00455</b> | <b>0.006456</b> | 0.115         | 35.32        | <b>15.64</b> | 1.4249      | 0.512         | 14.88           |
| LFISTA       | 0.0072         | 0.00844         | <b>0.0477</b> | 33.43        | 17.477       | <b>1.69</b> | <b>0.9258</b> | 26.524          |
| LFISTA-SHARP | 0.0077         | 0.0094          | 0.0505        | 30.937       | 16.84        | 1.35        | 0.903         | 24.775          |

Table 3. Comparative results on synthetic data (different evaluation measures averaged across 10 videos).

| Method   | OFE1↓           | OFE2↓           | OFEP↓           | BRISQUE↓    | NIQE↓        | SM↑             |
|----------|-----------------|-----------------|-----------------|-------------|--------------|-----------------|
| Original | 0.009882        | 0.012696        | 0.071894        | <b>42.9</b> | 19.37        | 1.0             |
| NFFA [4] | 0.006918        | 0.0101          | 0.064           | 46.56       | 19.07        | <b>1.413925</b> |
| LFISTA   | <b>0.005654</b> | <b>0.007826</b> | <b>0.034621</b> | 51.86       | <b>17.79</b> | 1.366949        |

Table 4. Quantitative comparison (values of different measures averaged across 60 videos) between LFISTA and NFFA.

## 5. Results on Synthetic Data

We performed a restoration study on a set of 10 clean and temporally consistent videos of size  $640 \times 360$  gathered from <https://www.videvo.net/>. These videos were degraded synthetically using (1) blotch templates as mentioned in the github repository associated with [8], and (2) flicker induced by multiplying each frame with a number generated from Uniform(0.8, 1.2). The degraded videos were restored by various competing methods and no-reference as well as full-reference quality measures are included in Tab. 3. All measures are averaged over all 10 videos. The full-reference measures are SSIM (structured similarity index) and PSNR (peak signal to noise ratio). We observed that NFFA did not remove blotches and hence produced lower SSIM and PSNR values as compared to our method. RTN again yielded high frequency artifacts. Results on a sample synthetic video are included in the accompanying video file ‘revised\_supplemental\_video\_542.mp4’.

## 6. Comparisons with NFFA

We present a quantitative comparison between LFISTA and NFFA [4] on a subset of the dataset from [4]. The subset contains 60 video clips from old movies with flicker artifacts. The results are presented in Table 4. From these results, we see that the performance of LFISTA and NFFA are comparable on various metrics, even on a dataset released by their paper.

## 7. Quantitative Results

This section contains Table 5 which shows numerical results for each video from the datasets  $D1$ ,  $D2$ ,  $D3$  described in Sec. 4.1 of the main paper. The actual weblink for every video is also included in the table (wherever applicable). The comparison metrics OFE1, OFE2 and OFEP are defined in Sec. 4 of the main paper.

Table 5. Detailed quantitative comparison of our method on various video sequences to existing methods: RTN [7], DeepRemaster [2], OldPhoto [8] + TS [3] and NeatVideo. For each video sequence, a weblink is included.

| Dataset | Video     | Method        | OFE1    | OFE2    | OFEP    | BRISQUE | NIQE  | SM      | Link                 |
|---------|-----------|---------------|---------|---------|---------|---------|-------|---------|----------------------|
| $D1$    | Example 1 | Original      | 0.01246 | 0.01577 | 0.07096 | 40.65   | 24.39 | 1.00000 | <a href="#">link</a> |
|         |           | OldPhoto + TS | 0.01124 | 0.01512 | 0.14651 | 25.11   | 15.16 | 0.85119 | <a href="#">link</a> |
|         |           | Deepremaster  | 0.01148 | 0.01630 | 0.06289 | 42.74   | 23.20 | 0.90080 | <a href="#">link</a> |
|         |           | NeatVideo     | 0.00765 | 0.01101 | 0.05364 | 46.73   | 23.06 | 1.13249 | <a href="#">link</a> |
|         |           | RTN           | 0.00889 | 0.01347 | 0.06570 | 26.19   | 22.20 | 0.89253 | <a href="#">link</a> |
|         |           | NFFA          | 0.01164 | 0.01649 | 0.01556 | 49.48   | 16.01 | 0.98754 | <a href="#">link</a> |
|         |           | LFISTA        | 0.00886 | 0.01227 | 0.06328 | 45.49   | 23.50 | 1.08302 | <a href="#">link</a> |
|         |           | LFISTA-SHARP  | 0.00917 | 0.01253 | 0.08898 | 41.46   | 15.61 | 0.97680 | <a href="#">link</a> |

|                                                    |               |         |         |         |       |       |         |                      |
|----------------------------------------------------|---------------|---------|---------|---------|-------|-------|---------|----------------------|
| De l'importance des chars dans la victoire de 1918 | Original      | 0.01287 | 0.01860 | 0.06435 | 45.62 | 22.04 | 1.00000 | <a href="#">link</a> |
|                                                    | OldPhoto + TS | 0.01017 | 0.02123 | 0.09963 | 51.89 | 19.27 | 1.04633 | <a href="#">link</a> |
|                                                    | Deepremaster  | 0.01158 | 0.01572 | 0.04588 | 45.86 | 22.41 | 0.94057 | <a href="#">link</a> |
|                                                    | NeatVideo     | 0.01192 | 0.01155 | 0.02944 | 48.23 | 22.32 | 1.09836 | <a href="#">link</a> |
|                                                    | RTN           | 0.01319 | 0.01680 | 0.07725 | 25.03 | 20.03 | 0.61454 | <a href="#">link</a> |
|                                                    | NFFA          | 0.00621 | 0.00897 | 0.06121 | 50.64 | 21.39 | 1.97109 | <a href="#">link</a> |
|                                                    | LFISTA        | 0.00856 | 0.01394 | 0.02839 | 46.61 | 22.09 | 1.09591 | <a href="#">link</a> |
|                                                    | LFISTA-SHARP  | 0.01015 | 0.01548 | 0.05036 | 45.50 | 19.56 | 0.96152 | <a href="#">link</a> |
| Exemple 2                                          | Original      | 0.00931 | 0.01222 | 0.06804 | 42.18 | 23.43 | 1.00000 | <a href="#">link</a> |
|                                                    | OldPhoto + TS | 0.01014 | 0.01253 | 0.11534 | 39.97 | 15.42 | 0.72417 | <a href="#">link</a> |
|                                                    | Deepremaster  | 0.00893 | 0.01247 | 0.04466 | 48.73 | 20.33 | 0.93340 | <a href="#">link</a> |
|                                                    | NeatVideo     | 0.00532 | 0.00805 | 0.02696 | 48.76 | 20.67 | 1.02866 | <a href="#">link</a> |
|                                                    | RTN           | 0.00833 | 0.01052 | 0.04645 | 36.19 | 20.53 | 0.84309 | <a href="#">link</a> |
|                                                    | NFFA          | 0.00884 | 0.01639 | 0.02880 | 51.00 | 17.16 | 0.50311 | <a href="#">link</a> |
|                                                    | LFISTA        | 0.00558 | 0.00741 | 0.02884 | 51.52 | 20.69 | 1.02429 | <a href="#">link</a> |
|                                                    | LFISTA-SHARP  | 0.00626 | 0.00844 | 0.04124 | 45.77 | 17.30 | 0.91943 | <a href="#">link</a> |
| Exemple 3                                          | Original      | 0.00757 | 0.01185 | 0.01939 | 55.36 | 17.71 | 1.00000 | <a href="#">link</a> |
|                                                    | OldPhoto + TS | 0.00643 | 0.00908 | 0.03009 | 51.78 | 20.06 | 1.39112 | <a href="#">link</a> |
|                                                    | Deepremaster  | 0.00757 | 0.01217 | 0.01581 | 58.89 | 23.20 | 0.98448 | <a href="#">link</a> |
|                                                    | NeatVideo     | 0.00529 | 0.00856 | 0.01232 | 58.75 | 23.26 | 1.36637 | <a href="#">link</a> |
|                                                    | RTN           | 0.01034 | 0.01343 | 0.02846 | 36.27 | 22.75 | 0.90917 | <a href="#">link</a> |
|                                                    | NFFA          | 0.00478 | 0.00638 | 0.01193 | 54.72 | 18.88 | 2.07086 | <a href="#">link</a> |
|                                                    | LFISTA        | 0.00515 | 0.00779 | 0.01115 | 56.37 | 23.70 | 1.52130 | <a href="#">link</a> |
|                                                    | LFISTA-SHARP  | 0.00625 | 0.00903 | 0.01483 | 55.30 | 17.74 | 1.27480 | <a href="#">link</a> |
| Le Mort qui tue (film, 1913) Sequence 1            | Original      | 0.00723 | 0.01104 | 0.02058 | 47.06 | 18.71 | 1.00000 | <a href="#">link</a> |
|                                                    | OldPhoto + TS | 0.00624 | 0.00848 | 0.02773 | 54.84 | 16.84 | 1.16491 | <a href="#">link</a> |
|                                                    | Deepremaster  | 0.00750 | 0.01125 | 0.01916 | 49.05 | 20.12 | 0.98674 | <a href="#">link</a> |
|                                                    | NeatVideo     | 0.00540 | 0.00821 | 0.01571 | 48.21 | 20.28 | 1.15251 | <a href="#">link</a> |
|                                                    | RTN           | 0.00893 | 0.01144 | 0.02731 | 26.93 | 20.20 | 0.77193 | <a href="#">link</a> |
|                                                    | NFFA          | 0.00576 | 0.00752 | 0.02191 | 47.30 | 17.63 | 1.28934 | <a href="#">link</a> |
|                                                    | LFISTA        | 0.00497 | 0.00685 | 0.01228 | 47.44 | 20.02 | 1.39167 | <a href="#">link</a> |
|                                                    | LFISTA-SHARP  | 0.00593 | 0.00802 | 0.01440 | 43.92 | 18.19 | 1.09858 | <a href="#">link</a> |
| Le Mort qui tue (film, 1913) Sequence 2            | Original      | 0.00495 | 0.00734 | 0.01795 | 47.78 | 20.31 | 1.00000 | <a href="#">link</a> |
|                                                    | OldPhoto + TS | 0.00500 | 0.00660 | 0.02015 | 59.13 | 15.97 | 0.99781 | <a href="#">link</a> |
|                                                    | Deepremaster  | 0.00550 | 0.00776 | 0.01688 | 49.84 | 20.40 | 0.97629 | <a href="#">link</a> |
|                                                    | NeatVideo     | 0.00431 | 0.00623 | 0.01456 | 52.20 | 20.43 | 1.12097 | <a href="#">link</a> |
|                                                    | RTN           | 0.00699 | 0.00900 | 0.01952 | 33.47 | 21.64 | 0.79640 | <a href="#">link</a> |
|                                                    | NFFA          | 0.00503 | 0.00651 | 0.02292 | 51.90 | 20.19 | 1.57615 | <a href="#">link</a> |
|                                                    | LFISTA        | 0.00419 | 0.00573 | 0.00900 | 49.29 | 20.34 | 1.39048 | <a href="#">link</a> |
|                                                    | LFISTA-SHARP  | 0.00503 | 0.00681 | 0.01026 | 46.10 | 18.58 | 1.08330 | <a href="#">link</a> |
| Le Mort qui tue (film, 1913) Sequence 3            | Original      | 0.01003 | 0.01413 | 0.02122 | 80.75 | 19.33 | 1.00000 | <a href="#">link</a> |
|                                                    | OldPhoto + TS | 0.00917 | 0.01235 | 0.03227 | 68.57 | 16.91 | 1.18858 | <a href="#">link</a> |
|                                                    | Deepremaster  | 0.01024 | 0.01426 | 0.01875 | 78.47 | 20.84 | 1.02114 | <a href="#">link</a> |
|                                                    | NeatVideo     | 0.00880 | 0.01285 | 0.01683 | 82.19 | 21.34 | 1.06073 | <a href="#">link</a> |
|                                                    | RTN           | 0.01149 | 0.01419 | 0.03016 | 57.65 | 21.39 | 0.72196 | <a href="#">link</a> |
|                                                    | NFFA          | 0.00802 | 0.01037 | 0.02541 | 78.65 | 21.05 | 0.97118 | <a href="#">link</a> |
|                                                    | LFISTA        | 0.00710 | 0.01050 | 0.01272 | 74.51 | 21.35 | 1.28823 | <a href="#">link</a> |
|                                                    | LFISTA-SHARP  | 0.00853 | 0.01179 | 0.01466 | 74.29 | 18.39 | 0.97191 | <a href="#">link</a> |

|                                         |                     |               |         |         |         |       |         |                      |                      |
|-----------------------------------------|---------------------|---------------|---------|---------|---------|-------|---------|----------------------|----------------------|
| Le Mort qui tue (film, 1913) Sequence 4 | Original            | 0.00724       | 0.01139 | 0.02006 | 42.85   | 21.54 | 1.00000 | <a href="#">link</a> |                      |
|                                         | OldPhoto + TS       | 0.00572       | 0.00794 | 0.02810 | 50.15   | 18.18 | 1.37910 | <a href="#">link</a> |                      |
|                                         | Deepremaster        | 0.00760       | 0.01179 | 0.01870 | 42.38   | 20.48 | 1.00270 | <a href="#">link</a> |                      |
|                                         | NeatVideo           | 0.00550       | 0.00933 | 0.01252 | 47.17   | 20.30 | 1.15613 | <a href="#">link</a> |                      |
|                                         | RTN                 | 0.00910       | 0.01173 | 0.02811 | 16.14   | 20.50 | 0.82047 | <a href="#">link</a> |                      |
|                                         | NFFA                | 0.00813       | 0.01123 | 0.02723 | 75.14   | 21.72 | 0.96234 | <a href="#">link</a> |                      |
|                                         | LFISTA              | 0.00503       | 0.00755 | 0.01133 | 40.90   | 20.23 | 1.48842 | <a href="#">link</a> |                      |
|                                         | LFISTA-SHARP        | 0.00591       | 0.00858 | 0.01328 | 37.71   | 18.92 | 1.20482 | <a href="#">link</a> |                      |
| Example 4                               | Original            | 0.01747       | 0.01760 | 0.12250 | 36.50   | 19.47 | 1.00000 | <a href="#">link</a> |                      |
|                                         | OldPhoto + TS       | 0.01749       | 0.01851 | 0.22618 | 34.08   | 19.12 | 0.77074 | <a href="#">link</a> |                      |
|                                         | Deepremaster        | 0.01410       | 0.01721 | 0.09121 | 43.05   | 23.23 | 0.94377 | <a href="#">link</a> |                      |
|                                         | NeatVideo           | 0.00513       | 0.00760 | 0.04535 | 48.04   | 23.13 | 1.13304 | <a href="#">link</a> |                      |
|                                         | RTN                 | 0.01090       | 0.01339 | 0.08504 | 18.94   | 23.38 | 0.77152 | <a href="#">link</a> |                      |
|                                         | NFFA                | 0.00769       | 0.01103 | 0.04253 | 46.39   | 19.72 | 0.96726 | <a href="#">link</a> |                      |
|                                         | LFISTA              | 0.00714       | 0.00912 | 0.05776 | 47.93   | 22.87 | 1.11591 | <a href="#">link</a> |                      |
|                                         | LFISTA-SHARP        | 0.00755       | 0.00973 | 0.10641 | 46.25   | 19.05 | 0.95865 | <a href="#">link</a> |                      |
| The study of the Channel Tunnel project | Original            | 0.01108       | 0.01796 | 0.08044 | 31.23   | 23.52 | 1.00000 | <a href="#">link</a> |                      |
|                                         | OldPhoto + TS       | 0.00716       | 0.00973 | 0.05002 | 49.27   | 15.75 | 1.29625 | <a href="#">link</a> |                      |
|                                         | Deepremaster        | 0.00889       | 0.01595 | 0.04574 | 41.44   | 21.13 | 0.98691 | <a href="#">link</a> |                      |
|                                         | NeatVideo           | 0.00756       | 0.01777 | 0.01928 | 47.22   | 21.64 | 1.07383 | <a href="#">link</a> |                      |
|                                         | RTN                 | 0.00817       | 0.01517 | 0.04237 | 20.81   | 22.04 | 0.80364 | <a href="#">link</a> |                      |
|                                         | NFFA                | 0.00403       | 0.00561 | 0.07413 | 42.36   | 18.81 | 2.01658 | <a href="#">link</a> |                      |
|                                         | LFISTA              | 0.00710       | 0.01479 | 0.02649 | 41.92   | 21.90 | 1.08459 | <a href="#">link</a> |                      |
|                                         | LFISTA-SHARP        | 0.00593       | 0.01019 | 0.02844 | 38.67   | 16.54 | 0.93687 | <a href="#">link</a> |                      |
| Example 5                               | Original            | 0.00833       | 0.01252 | 0.01956 | 34.64   | 18.29 | 1.00000 | <a href="#">link</a> |                      |
|                                         | OldPhoto + TS       | 0.00824       | 0.01078 | 0.03401 | 37.99   | 17.44 | 1.13718 | <a href="#">link</a> |                      |
|                                         | Deepremaster        | 0.00810       | 0.01255 | 0.01625 | 40.65   | 24.54 | 1.02161 | <a href="#">link</a> |                      |
|                                         | NeatVideo           | 0.00565       | 0.00894 | 0.01443 | 38.94   | 24.87 | 1.25574 | <a href="#">link</a> |                      |
|                                         | RTN                 | 0.01066       | 0.01329 | 0.02866 | 15.36   | 25.06 | 0.75405 | <a href="#">link</a> |                      |
|                                         | NFFA                | 0.00525       | 0.00679 | 0.01434 | 36.21   | 18.48 | 1.57343 | <a href="#">link</a> |                      |
|                                         | LFISTA              | 0.00547       | 0.00849 | 0.01229 | 37.17   | 24.94 | 1.32683 | <a href="#">link</a> |                      |
|                                         | LFISTA-SHARP        | 0.00683       | 0.00991 | 0.01520 | 33.45   | 18.67 | 1.03981 | <a href="#">link</a> |                      |
| D2                                      | Example 1 (190 fps) | Original      | 0.01619 | 0.01184 | 0.01350 | 17.17 | 22.06   | 1.00000              | <a href="#">link</a> |
|                                         |                     | OldPhoto + TS | 0.01240 | 0.01011 | 0.01359 | 27.86 | 16.61   | 1.20848              | <a href="#">link</a> |
|                                         |                     | Deepremaster  | 0.01132 | 0.01108 | 0.03390 | 28.22 | 21.56   | 0.89122              | <a href="#">link</a> |
|                                         |                     | NeatVideo     | 0.00517 | 0.00434 | 0.00576 | 19.99 | 22.12   | 2.76306              | <a href="#">link</a> |
|                                         |                     | RTN           | 0.00979 | 0.01204 | 0.02491 | 40.99 | 21.43   | 0.71483              | <a href="#">link</a> |
|                                         |                     | NFFA          | 0.00344 | 0.00447 | 0.00832 | 28.26 | 22.64   | 1.25105              | <a href="#">link</a> |
|                                         |                     | LFISTA        | 0.00431 | 0.00420 | 0.00413 | 26.54 | 22.21   | 2.95666              | <a href="#">link</a> |
|                                         |                     | LFISTA-SHARP  | 0.00417 | 0.00463 | 0.00343 | 25.61 | 19.57   | 2.31342              | <a href="#">link</a> |
|                                         | Example 2 (150 fps) | Original      | 0.01298 | 0.01163 | 0.00807 | 20.57 | 20.57   | 1.00000              | <a href="#">link</a> |
|                                         |                     | OldPhoto + TS | 0.01060 | 0.01028 | 0.01879 | 29.37 | 15.82   | 1.10486              | <a href="#">link</a> |
|                                         |                     | Deepremaster  | 0.00949 | 0.01054 | 0.01312 | 36.94 | 20.56   | 1.06048              | <a href="#">link</a> |
|                                         |                     | NeatVideo     | 0.00489 | 0.00507 | 0.00412 | 27.10 | 20.94   | 1.11053              | <a href="#">link</a> |
|                                         |                     | RTN           | 0.00807 | 0.00950 | 0.01063 | 27.39 | 18.49   | 0.91092              | <a href="#">link</a> |
|                                         |                     | NFFA          | 0.00433 | 0.00564 | 0.01024 | 40.85 | 17.65   | 0.89206              | <a href="#">link</a> |
|                                         |                     | LFISTA        | 0.00427 | 0.00470 | 0.00369 | 37.11 | 20.98   | 1.15442              | <a href="#">link</a> |
|                                         |                     | LFISTA-SHARP  | 0.00464 | 0.00553 | 0.00606 | 34.95 | 15.25   | 1.03161              | <a href="#">link</a> |
| Guitar Video (240 fps)                  | Original            | 0.02145       | 0.02017 | 0.06741 | 31.97   | 14.35 | 1.00000 | -                    |                      |

|    |                                                 |               |         |         |         |       |       |         |                      |
|----|-------------------------------------------------|---------------|---------|---------|---------|-------|-------|---------|----------------------|
|    |                                                 | OldPhoto + TS | 0.02078 | 0.01998 | 0.07714 | 30.55 | 11.99 | 1.00773 | -                    |
|    |                                                 | Deepremaster  | 0.01944 | 0.01850 | 0.04392 | 36.89 | 15.18 | 1.50771 | -                    |
|    |                                                 | NeatVideo     | 0.01633 | 0.01372 | 0.05416 | 31.81 | 13.81 | 2.37171 | -                    |
|    |                                                 | RTN           | 0.00759 | 0.00853 | 0.01999 | 16.26 | 13.28 | 2.96772 | -                    |
|    |                                                 | NFFA          | 0.00396 | 0.00514 | 0.01700 | 40.85 | 16.22 | 4.26872 | -                    |
|    |                                                 | LFISTA        | 0.00360 | 0.00425 | 0.00838 | 36.59 | 14.86 | 7.61568 | -                    |
|    |                                                 | LFISTA-SHARP  | 0.00415 | 0.00500 | 0.01061 | 32.46 | 15.54 | 5.92946 | -                    |
|    | Example 4 (190 fps)                             | Original      | 0.01625 | 0.01281 | 0.01840 | 22.80 | 22.13 | 1.00000 | <a href="#">link</a> |
|    |                                                 | OldPhoto + TS | 0.01189 | 0.01082 | 0.01979 | 25.79 | 12.81 | 1.10204 | <a href="#">link</a> |
|    |                                                 | Deepremaster  | 0.01205 | 0.01232 | 0.04981 | 32.86 | 22.49 | 0.85032 | <a href="#">link</a> |
|    |                                                 | NeatVideo     | 0.00683 | 0.00687 | 0.01308 | 28.05 | 22.10 | 1.26899 | <a href="#">link</a> |
|    |                                                 | RTN           | 0.00947 | 0.01120 | 0.02162 | 16.08 | 20.60 | 0.81068 | <a href="#">link</a> |
|    |                                                 | NFFA          | 0.00359 | 0.00465 | 0.00794 | 34.28 | 15.28 | 2.67800 | <a href="#">link</a> |
|    |                                                 | LFISTA        | 0.00588 | 0.00642 | 0.01014 | 31.24 | 22.19 | 1.32682 | <a href="#">link</a> |
|    |                                                 | LFISTA-SHARP  | 0.00478 | 0.00543 | 0.00508 | 30.48 | 13.76 | 1.10209 | <a href="#">link</a> |
|    | Example 3 (150 fps)                             | Original      | 0.00407 | 0.00424 | 0.00697 | 17.06 | 22.42 | 1.00000 | <a href="#">link</a> |
|    |                                                 | OldPhoto + TS | 0.00514 | 0.00618 | 0.00571 | 18.28 | 18.22 | 0.49762 | <a href="#">link</a> |
|    |                                                 | Deepremaster  | 0.00428 | 0.00499 | 0.01008 | 27.06 | 22.60 | 0.87568 | <a href="#">link</a> |
|    |                                                 | NeatVideo     | 0.00292 | 0.00310 | 0.00390 | 22.34 | 22.34 | 1.18771 | <a href="#">link</a> |
|    |                                                 | RTN           | 0.00743 | 0.00941 | 0.02793 | 27.40 | 20.94 | 0.39044 | <a href="#">link</a> |
|    |                                                 | NFFA          | 0.00269 | 0.00324 | 0.00452 | 32.31 | 28.62 | 0.95253 | <a href="#">link</a> |
|    |                                                 | LFISTA        | 0.00248 | 0.00277 | 0.00295 | 30.10 | 22.24 | 1.44467 | <a href="#">link</a> |
|    |                                                 | LFISTA-SHARP  | 0.00248 | 0.00306 | 0.00297 | 27.17 | 27.47 | 1.14998 | <a href="#">link</a> |
| D3 | The Dog Outwits the Kidnapper (1908) Sequence 1 | Original      | 0.00758 | 0.01172 | 0.03481 | 40.51 | 20.38 | 1.00000 | <a href="#">link</a> |
|    |                                                 | OldPhoto + TS | 0.00956 | 0.01280 | 0.05017 | 27.67 | 17.78 | 0.89654 | <a href="#">link</a> |
|    |                                                 | Deepremaster  | 0.00844 | 0.01220 | 0.02907 | 40.42 | 20.75 | 0.97080 | <a href="#">link</a> |
|    |                                                 | NeatVideo     | 0.00664 | 0.01042 | 0.02230 | 42.19 | 20.50 | 1.03256 | <a href="#">link</a> |
|    |                                                 | RTN           | 0.01112 | 0.01328 | 0.04765 | 20.43 | 18.81 | 0.62921 | <a href="#">link</a> |
|    |                                                 | NFFA          | 0.00697 | 0.00967 | 0.04653 | 43.17 | 17.39 | 1.32844 | <a href="#">link</a> |
|    |                                                 | LFISTA        | 0.00607 | 0.00830 | 0.01985 | 37.52 | 20.41 | 1.05341 | <a href="#">link</a> |
|    |                                                 | LFISTA-SHARP  | 0.00734 | 0.00981 | 0.02310 | 35.88 | 16.80 | 0.72825 | <a href="#">link</a> |
|    | The Dog Outwits the Kidnapper (1908) Sequence 2 | Original      | 0.00952 | 0.01526 | 0.02332 | 33.03 | 21.31 | 1.00000 | <a href="#">link</a> |
|    |                                                 | OldPhoto + TS | 0.01015 | 0.01490 | 0.03460 | 19.51 | 19.55 | 0.99608 | <a href="#">link</a> |
|    |                                                 | Deepremaster  | 0.00999 | 0.01539 | 0.02307 | 31.32 | 21.08 | 0.99461 | <a href="#">link</a> |
|    |                                                 | NeatVideo     | 0.00849 | 0.01388 | 0.01905 | 33.45 | 21.34 | 1.11652 | <a href="#">link</a> |
|    |                                                 | RTN           | 0.01121 | 0.01408 | 0.04036 | 10.54 | 20.71 | 0.77373 | <a href="#">link</a> |
|    |                                                 | NFFA          | 0.00676 | 0.00904 | 0.02513 | 32.32 | 23.64 | 1.56936 | <a href="#">link</a> |
|    |                                                 | LFISTA        | 0.00642 | 0.01019 | 0.01453 | 33.15 | 20.96 | 1.49502 | <a href="#">link</a> |
|    |                                                 | LFISTA-SHARP  | 0.00771 | 0.01137 | 0.01695 | 32.68 | 21.32 | 1.09239 | <a href="#">link</a> |
|    | The Dog Outwits the Kidnapper (1908) Sequence 3 | Original      | 0.00949 | 0.01416 | 0.02990 | 43.28 | 20.96 | 1.00000 | <a href="#">link</a> |
|    |                                                 | OldPhoto + TS | 0.00996 | 0.01398 | 0.03916 | 33.06 | 17.34 | 0.98803 | <a href="#">link</a> |
|    |                                                 | Deepremaster  | 0.00988 | 0.01420 | 0.02749 | 43.63 | 20.90 | 0.99290 | <a href="#">link</a> |
|    |                                                 | NeatVideo     | 0.00578 | 0.00927 | 0.01656 | 45.91 | 21.16 | 1.38328 | <a href="#">link</a> |
|    |                                                 | RTN           | 0.01062 | 0.01313 | 0.04445 | 20.45 | 21.06 | 0.80632 | <a href="#">link</a> |
|    |                                                 | NFFA          | 0.00680 | 0.00890 | 0.03337 | 43.47 | 17.31 | 1.20447 | <a href="#">link</a> |
|    |                                                 | LFISTA        | 0.00631 | 0.00935 | 0.01685 | 43.13 | 20.98 | 1.37794 | <a href="#">link</a> |
|    |                                                 | LFISTA-SHARP  | 0.00751 | 0.01051 | 0.02064 | 41.67 | 16.47 | 1.02737 | <a href="#">link</a> |



|                                                 |               |         |         |         |       |       |         |                      |
|-------------------------------------------------|---------------|---------|---------|---------|-------|-------|---------|----------------------|
| The Dog Outwits the Kidnapper (1908) Sequence 4 | Original      | 0.00812 | 0.01272 | 0.02913 | 36.10 | 22.10 | 1.00000 | <a href="#">link</a> |
|                                                 | OldPhoto + TS | 0.00866 | 0.01231 | 0.03944 | 24.72 | 17.84 | 0.93871 | <a href="#">link</a> |
|                                                 | Deepremaster  | 0.00850 | 0.01288 | 0.02549 | 36.48 | 21.67 | 0.96929 | <a href="#">link</a> |
|                                                 | NeatVideo     | 0.00501 | 0.00759 | 0.01990 | 38.22 | 22.24 | 1.08419 | <a href="#">link</a> |
|                                                 | RTN           | 0.01008 | 0.01223 | 0.04340 | 15.93 | 20.29 | 0.68978 | <a href="#">link</a> |
|                                                 | NFFA          | 0.00617 | 0.00820 | 0.03414 | 43.53 | 18.34 | 1.02252 | <a href="#">link</a> |
|                                                 | LFISTA        | 0.00558 | 0.00770 | 0.01648 | 35.02 | 21.64 | 1.11579 | <a href="#">link</a> |
|                                                 | LFISTA-SHARP  | 0.00667 | 0.00899 | 0.02142 | 32.33 | 18.74 | 0.85639 | <a href="#">link</a> |
| The Dog Outwits the Kidnapper (1908) Sequence 5 | Original      | 0.01088 | 0.01797 | 0.04111 | 35.53 | 20.26 | 1.00000 | <a href="#">link</a> |
|                                                 | OldPhoto + TS | 0.01123 | 0.01677 | 0.05730 | 21.00 | 15.64 | 1.08419 | <a href="#">link</a> |
|                                                 | Deepremaster  | 0.01123 | 0.01767 | 0.03237 | 35.40 | 21.01 | 1.02365 | <a href="#">link</a> |
|                                                 | NeatVideo     | 0.00787 | 0.01321 | 0.02700 | 37.05 | 20.33 | 1.40940 | <a href="#">link</a> |
|                                                 | RTN           | 0.01142 | 0.01464 | 0.04891 | 16.61 | 19.30 | 0.99579 | <a href="#">link</a> |
|                                                 | NFFA          | 0.00633 | 0.00852 | 0.03484 | 35.58 | 15.31 | 2.24099 | <a href="#">link</a> |
|                                                 | LFISTA        | 0.00715 | 0.01184 | 0.01781 | 33.32 | 20.30 | 1.62353 | <a href="#">link</a> |
|                                                 | LFISTA-SHARP  | 0.00833 | 0.01273 | 0.02327 | 30.16 | 16.31 | 1.30894 | <a href="#">link</a> |
| The Dog Outwits the Kidnapper (1908) Sequence 6 | Original      | 0.00812 | 0.01299 | 0.02723 | 39.55 | 19.68 | 1.00000 | <a href="#">link</a> |
|                                                 | OldPhoto + TS | 0.00980 | 0.01338 | 0.04132 | 30.38 | 18.88 | 0.89377 | <a href="#">link</a> |
|                                                 | Deepremaster  | 0.00878 | 0.01330 | 0.02521 | 40.15 | 19.69 | 0.97111 | <a href="#">link</a> |
|                                                 | NeatVideo     | 0.00502 | 0.00795 | 0.01773 | 41.44 | 19.76 | 1.09725 | <a href="#">link</a> |
|                                                 | RTN           | 0.01157 | 0.01377 | 0.04229 | 25.01 | 18.38 | 0.66748 | <a href="#">link</a> |
|                                                 | NFFA          | 0.00656 | 0.00897 | 0.03397 | 37.23 | 16.88 | 1.24093 | <a href="#">link</a> |
|                                                 | LFISTA        | 0.00591 | 0.00844 | 0.01671 | 38.15 | 19.69 | 1.08761 | <a href="#">link</a> |
|                                                 | LFISTA-SHARP  | 0.00727 | 0.00997 | 0.01904 | 37.47 | 19.22 | 0.80084 | <a href="#">link</a> |
| The Dog Outwits the Kidnapper (1908) Sequence 7 | Original      | 0.00747 | 0.01192 | 0.03485 | 42.84 | 21.67 | 1.00000 | <a href="#">link</a> |
|                                                 | OldPhoto + TS | 0.00790 | 0.01103 | 0.04300 | 32.35 | 17.62 | 1.00291 | <a href="#">link</a> |
|                                                 | Deepremaster  | 0.00778 | 0.01203 | 0.02843 | 43.43 | 21.82 | 0.99744 | <a href="#">link</a> |
|                                                 | NeatVideo     | 0.00504 | 0.00756 | 0.02372 | 46.01 | 21.75 | 1.16513 | <a href="#">link</a> |
|                                                 | RTN           | 0.00960 | 0.01160 | 0.04403 | 19.42 | 20.68 | 0.65195 | <a href="#">link</a> |
|                                                 | NFFA          | 0.00590 | 0.00763 | 0.03888 | 44.30 | 16.60 | 0.95972 | <a href="#">link</a> |
|                                                 | LFISTA        | 0.00523 | 0.00734 | 0.01618 | 39.68 | 21.46 | 1.10698 | <a href="#">link</a> |
|                                                 | LFISTA-SHARP  | 0.00638 | 0.00865 | 0.02076 | 35.13 | 16.57 | 0.84180 | <a href="#">link</a> |
| The Dog Outwits the Kidnapper (1908) Sequence 8 | Original      | 0.00929 | 0.01466 | 0.03262 | 35.55 | 20.15 | 1.00000 | <a href="#">link</a> |
|                                                 | OldPhoto + TS | 0.00998 | 0.01409 | 0.04639 | 22.35 | 15.85 | 0.96370 | <a href="#">link</a> |
|                                                 | Deepremaster  | 0.00968 | 0.01471 | 0.02779 | 35.20 | 20.34 | 0.99441 | <a href="#">link</a> |
|                                                 | NeatVideo     | 0.00522 | 0.00853 | 0.01748 | 38.67 | 20.26 | 1.23861 | <a href="#">link</a> |
|                                                 | RTN           | 0.01076 | 0.01311 | 0.04173 | 14.32 | 19.54 | 0.67675 | <a href="#">link</a> |
|                                                 | NFFA          | 0.00614 | 0.00893 | 0.03723 | 44.23 | 17.35 | 0.98234 | <a href="#">link</a> |
|                                                 | LFISTA        | 0.00596 | 0.00900 | 0.01818 | 33.55 | 20.24 | 1.22483 | <a href="#">link</a> |
|                                                 | LFISTA-SHARP  | 0.00716 | 0.01027 | 0.02047 | 29.64 | 16.93 | 0.85714 | <a href="#">link</a> |
| The Dog Outwits the Kidnapper (1908) Sequence 9 | Original      | 0.00714 | 0.01112 | 0.02902 | 36.90 | 19.87 | 1.00000 | <a href="#">link</a> |

|                                                      |               |         |         |         |       |       |         |                      |
|------------------------------------------------------|---------------|---------|---------|---------|-------|-------|---------|----------------------|
|                                                      | OldPhoto + TS | 0.00947 | 0.01259 | 0.04422 | 24.37 | 17.33 | 0.86835 | <a href="#">link</a> |
|                                                      | Deepremaster  | 0.00801 | 0.01160 | 0.02609 | 37.29 | 20.25 | 0.98959 | <a href="#">link</a> |
|                                                      | NeatVideo     | 0.00564 | 0.00833 | 0.02174 | 38.62 | 19.95 | 1.07314 | <a href="#">link</a> |
|                                                      | RTN           | 0.01132 | 0.01343 | 0.04983 | 16.91 | 18.37 | 0.60024 | <a href="#">link</a> |
|                                                      | NFFA          | 0.00638 | 0.00855 | 0.03526 | 44.53 | 17.56 | 1.11593 | <a href="#">link</a> |
|                                                      | LFISTA        | 0.00605 | 0.00824 | 0.01738 | 34.35 | 19.93 | 1.10902 | <a href="#">link</a> |
|                                                      | LFISTA-SHARP  | 0.00751 | 0.00989 | 0.02093 | 33.42 | 15.66 | 0.78885 | <a href="#">link</a> |
| Kanch Ki Gudiya<br>1961                              | Original      | 0.00638 | 0.00801 | 0.02851 | 50.79 | 23.34 | 1.00000 | <a href="#">link</a> |
|                                                      | OldPhoto + TS | 0.00600 | 0.00759 | 0.03232 | 46.67 | 15.81 | 1.21837 | <a href="#">link</a> |
|                                                      | Deepremaster  | 0.00689 | 0.00907 | 0.02524 | 47.80 | 23.51 | 0.91302 | <a href="#">link</a> |
|                                                      | NeatVideo     | 0.00513 | 0.00681 | 0.01860 | 53.73 | 22.95 | 1.04101 | <a href="#">link</a> |
|                                                      | RTN           | 0.00707 | 0.00874 | 0.03061 | 38.62 | 21.82 | 0.66838 | <a href="#">link</a> |
|                                                      | NFFA          | 0.00608 | 0.00884 | 0.04613 | 46.21 | 15.67 | 1.53962 | <a href="#">link</a> |
|                                                      | LFISTA        | 0.00480 | 0.00641 | 0.01709 | 47.75 | 23.17 | 1.07537 | <a href="#">link</a> |
|                                                      | LFISTA-SHARP  | 0.00580 | 0.00752 | 0.01995 | 45.24 | 13.81 | 0.81795 | <a href="#">link</a> |
| Indian song                                          | Original      | 0.00459 | 0.00724 | 0.02613 | 50.54 | 25.97 | 1.00000 | <a href="#">link</a> |
|                                                      | OldPhoto + TS | 0.00479 | 0.00664 | 0.03380 | 48.02 | 15.43 | 0.92676 | <a href="#">link</a> |
|                                                      | Deepremaster  | 0.00464 | 0.00733 | 0.02343 | 54.35 | 26.27 | 0.92952 | <a href="#">link</a> |
|                                                      | NeatVideo     | 0.00297 | 0.00447 | 0.01529 | 55.44 | 26.13 | 1.13874 | <a href="#">link</a> |
|                                                      | RTN           | 0.00529 | 0.00716 | 0.03307 | 34.66 | 23.75 | 0.82591 | <a href="#">link</a> |
|                                                      | NFFA          | 0.00599 | 0.00892 | 0.03551 | 45.23 | 17.23 | 1.30013 | <a href="#">link</a> |
|                                                      | LFISTA        | 0.00318 | 0.00466 | 0.01503 | 52.58 | 26.02 | 1.15312 | <a href="#">link</a> |
|                                                      | LFISTA-SHARP  | 0.00374 | 0.00527 | 0.02228 | 50.71 | 16.72 | 0.95135 | <a href="#">link</a> |
| Mabel and Fatty's<br>Married Life 1915<br>Sequence 1 | Original      | 0.00600 | 0.01068 | 0.01644 | 55.21 | 21.57 | 1.00000 | <a href="#">link</a> |
|                                                      | OldPhoto + TS | 0.00706 | 0.01091 | 0.02478 | 36.77 | 21.30 | 0.92290 | <a href="#">link</a> |
|                                                      | Deepremaster  | 0.00692 | 0.01125 | 0.01847 | 49.04 | 20.67 | 0.95763 | <a href="#">link</a> |
|                                                      | NeatVideo     | 0.00426 | 0.00738 | 0.01006 | 56.30 | 21.60 | 1.43142 | <a href="#">link</a> |
|                                                      | RTN           | 0.00948 | 0.01223 | 0.04130 | 22.80 | 18.91 | 0.76779 | <a href="#">link</a> |
|                                                      | NFFA          | 0.00609 | 0.00865 | 0.02347 | 46.35 | 18.25 | 1.29017 | <a href="#">link</a> |
|                                                      | LFISTA        | 0.00504 | 0.00764 | 0.01229 | 53.12 | 20.62 | 1.38248 | <a href="#">link</a> |
|                                                      | LFISTA-SHARP  | 0.00612 | 0.00890 | 0.01522 | 50.16 | 19.60 | 1.03407 | <a href="#">link</a> |
| Mabel and Fatty's<br>Married Life 1915<br>Sequence 2 | Original      | 0.01495 | 0.01940 | 0.04758 | 56.14 | 23.45 | 1.00000 | <a href="#">link</a> |
|                                                      | OldPhoto + TS | 0.01476 | 0.01792 | 0.07980 | 40.56 | 16.93 | 0.89677 | <a href="#">link</a> |
|                                                      | Deepremaster  | 0.01467 | 0.01958 | 0.04359 | 54.56 | 23.59 | 0.93974 | <a href="#">link</a> |
|                                                      | NeatVideo     | 0.00981 | 0.01365 | 0.02344 | 59.19 | 23.42 | 1.19818 | <a href="#">link</a> |
|                                                      | RTN           | 0.01082 | 0.01446 | 0.05544 | 34.96 | 22.71 | 0.84073 | <a href="#">link</a> |
|                                                      | NFFA          | 0.00902 | 0.01273 | 0.04476 | 44.23 | 18.52 | 0.92633 | <a href="#">link</a> |
|                                                      | LFISTA        | 0.01046 | 0.01379 | 0.03352 | 55.88 | 22.96 | 1.11548 | <a href="#">link</a> |
|                                                      | LFISTA-SHARP  | 0.01121 | 0.01410 | 0.05195 | 49.04 | 17.56 | 0.90382 | <a href="#">link</a> |
| Alphonse and Gas-<br>ton, no. 3                      | Original      | 0.00954 | 0.01568 | 0.04477 | 55.41 | 20.34 | 1.00000 | <a href="#">link</a> |
|                                                      | OldPhoto + TS | 0.01091 | 0.01607 | 0.06589 | 39.09 | 20.07 | 0.90077 | <a href="#">link</a> |
|                                                      | Deepremaster  | 0.01032 | 0.01585 | 0.04415 | 54.06 | 20.27 | 0.95327 | <a href="#">link</a> |
|                                                      | NeatVideo     | 0.00654 | 0.01060 | 0.02928 | 57.66 | 20.61 | 1.26671 | <a href="#">link</a> |
|                                                      | RTN           | 0.01135 | 0.01459 | 0.05284 | 35.08 | 19.06 | 0.73488 | <a href="#">link</a> |
|                                                      | NFFA          | 0.00902 | 0.01205 | 0.07683 | 53.47 | 19.28 | 1.38516 | <a href="#">link</a> |
|                                                      | LFISTA        | 0.00699 | 0.01045 | 0.03144 | 52.91 | 20.26 | 1.19557 | <a href="#">link</a> |
|                                                      | LFISTA-SHARP  | 0.00833 | 0.01206 | 0.04074 | 48.81 | 18.71 | 0.85416 | <a href="#">link</a> |



|                                                                   |               |         |         |         |       |       |         |                      |
|-------------------------------------------------------------------|---------------|---------|---------|---------|-------|-------|---------|----------------------|
| A gesture fight in Hester Street                                  | Original      | 0.01125 | 0.01877 | 0.05761 | 50.30 | 22.11 | 1.00000 | <a href="#">link</a> |
|                                                                   | OldPhoto + TS | 0.01252 | 0.01850 | 0.08699 | 32.56 | 17.83 | 0.87244 | <a href="#">link</a> |
|                                                                   | Deepremaster  | 0.01237 | 0.01905 | 0.05704 | 47.00 | 22.43 | 0.94530 | <a href="#">link</a> |
|                                                                   | NeatVideo     | 0.00926 | 0.01583 | 0.03429 | 51.85 | 22.80 | 1.14264 | <a href="#">link</a> |
|                                                                   | RTN           | 0.01344 | 0.01760 | 0.06561 | 28.23 | 20.09 | 0.77724 | <a href="#">link</a> |
|                                                                   | NFFA          | 0.00592 | 0.01134 | 0.03515 | 45.32 | 17.45 | 1.13514 | <a href="#">link</a> |
|                                                                   | LFISTA        | 0.00971 | 0.01597 | 0.04231 | 48.79 | 22.67 | 1.11672 | <a href="#">link</a> |
|                                                                   | LFISTA-SHARP  | 0.01111 | 0.01648 | 0.06266 | 44.71 | 18.73 | 0.83937 | <a href="#">link</a> |
| Panama Pacific Expo World's Fair in San Francisco 1915 Sequence 1 | Original      | 0.00634 | 0.00906 | 0.07257 | 63.01 | 24.18 | 1.00000 | <a href="#">link</a> |
|                                                                   | OldPhoto + TS | 0.00666 | 0.00895 | 0.06888 | 52.53 | 17.04 | 0.94053 | <a href="#">link</a> |
|                                                                   | Deepremaster  | 0.00622 | 0.00932 | 0.03642 | 63.46 | 24.28 | 0.96163 | <a href="#">link</a> |
|                                                                   | NeatVideo     | 0.00411 | 0.00628 | 0.01271 | 61.09 | 23.08 | 1.44503 | <a href="#">link</a> |
|                                                                   | RTN           | 0.00648 | 0.00839 | 0.02731 | 44.21 | 25.03 | 0.80439 | <a href="#">link</a> |
|                                                                   | NFFA          | 0.00449 | 0.00615 | 0.06476 | 46.44 | 16.23 | 1.27850 | <a href="#">link</a> |
|                                                                   | LFISTA        | 0.00420 | 0.00587 | 0.01213 | 57.57 | 22.37 | 1.47812 | <a href="#">link</a> |
|                                                                   | LFISTA-SHARP  | 0.00494 | 0.00671 | 0.01594 | 54.69 | 15.36 | 1.14781 | <a href="#">link</a> |
| Panama Pacific Expo World's Fair in San Francisco 1915 Sequence 2 | Original      | 0.00999 | 0.01370 | 0.03390 | 49.73 | 22.57 | 1.00000 | <a href="#">link</a> |
|                                                                   | OldPhoto + TS | 0.01106 | 0.01441 | 0.05109 | 32.56 | 18.75 | 0.84466 | <a href="#">link</a> |
|                                                                   | Deepremaster  | 0.00941 | 0.01370 | 0.02535 | 46.21 | 22.51 | 1.06345 | <a href="#">link</a> |
|                                                                   | NeatVideo     | 0.00566 | 0.00818 | 0.02087 | 51.10 | 22.74 | 1.52531 | <a href="#">link</a> |
|                                                                   | RTN           | 0.00816 | 0.01026 | 0.03228 | 31.65 | 23.40 | 0.92725 | <a href="#">link</a> |
|                                                                   | NFFA          | 0.00508 | 0.00677 | 0.02495 | 47.15 | 16.66 | 1.50904 | <a href="#">link</a> |
|                                                                   | LFISTA        | 0.00500 | 0.00680 | 0.01379 | 48.39 | 22.45 | 1.76780 | <a href="#">link</a> |
|                                                                   | LFISTA-SHARP  | 0.00607 | 0.00796 | 0.01699 | 42.25 | 17.29 | 1.29414 | <a href="#">link</a> |
| Panama Pacific Expo World's Fair in San Francisco 1915 Sequence 3 | Original      | 0.00719 | 0.01021 | 0.04281 | 51.58 | 24.37 | 1.00000 | <a href="#">link</a> |
|                                                                   | OldPhoto + TS | 0.00894 | 0.01170 | 0.05708 | 36.49 | 21.80 | 0.79807 | <a href="#">link</a> |
|                                                                   | Deepremaster  | 0.00729 | 0.01046 | 0.03307 | 48.61 | 23.86 | 1.03678 | <a href="#">link</a> |
|                                                                   | NeatVideo     | 0.00519 | 0.00752 | 0.02552 | 54.17 | 24.43 | 1.28871 | <a href="#">link</a> |
|                                                                   | RTN           | 0.00805 | 0.01031 | 0.04099 | 34.68 | 24.82 | 0.91092 | <a href="#">link</a> |
|                                                                   | NFFA          | 0.00570 | 0.00729 | 0.03605 | 46.24 | 17.24 | 1.57865 | <a href="#">link</a> |
|                                                                   | LFISTA        | 0.00486 | 0.00701 | 0.01864 | 47.73 | 23.62 | 1.44974 | <a href="#">link</a> |
|                                                                   | LFISTA-SHARP  | 0.00583 | 0.00809 | 0.02187 | 43.06 | 21.86 | 1.13982 | <a href="#">link</a> |
| RaviShankar                                                       | Original      | 0.00650 | 0.00634 | 0.03299 | 62.71 | 22.66 | 1.00000 | <a href="#">link</a> |
|                                                                   | OldPhoto + TS | 0.00620 | 0.00804 | 0.06452 | 53.11 | 15.92 | 0.71124 | <a href="#">link</a> |
|                                                                   | Deepremaster  | 0.00524 | 0.00771 | 0.02913 | 65.06 | 23.17 | 0.94563 | <a href="#">link</a> |
|                                                                   | NeatVideo     | 0.00416 | 0.00550 | 0.02348 | 64.52 | 22.85 | 1.00750 | <a href="#">link</a> |
|                                                                   | RTN           | 0.00553 | 0.00712 | 0.04434 | 37.67 | 23.44 | 0.81588 | <a href="#">link</a> |
|                                                                   | NFFA          | 0.00477 | 0.00686 | 0.03893 | 45.23 | 16.92 | 1.00876 | <a href="#">link</a> |
|                                                                   | LFISTA        | 0.00483 | 0.00540 | 0.02019 | 66.04 | 22.69 | 1.02279 | <a href="#">link</a> |
|                                                                   | LFISTA-SHARP  | 0.00466 | 0.00564 | 0.03337 | 61.20 | 16.74 | 0.84520 | <a href="#">link</a> |
| Indian song #2                                                    | Original      | 0.00878 | 0.00970 | 0.10937 | 40.90 | 24.29 | 1.00000 | <a href="#">link</a> |
|                                                                   | OldPhoto + TS | 0.01009 | 0.01136 | 0.14336 | 23.47 | 18.33 | 0.77925 | <a href="#">link</a> |
|                                                                   | Deepremaster  | 0.00794 | 0.00979 | 0.05651 | 37.87 | 24.04 | 0.91490 | <a href="#">link</a> |

|                                                                                                              |               |         |         |         |       |       |         |                      |
|--------------------------------------------------------------------------------------------------------------|---------------|---------|---------|---------|-------|-------|---------|----------------------|
|                                                                                                              | NeatVideo     | 0.00634 | 0.00732 | 0.04388 | 41.21 | 23.52 | 1.06481 | <a href="#">link</a> |
|                                                                                                              | RTN           | 0.00858 | 0.00962 | 0.05805 | 23.41 | 22.51 | 0.74619 | <a href="#">link</a> |
|                                                                                                              | NFFA          | 0.00666 | 0.00862 | 0.09048 | 45.96 | 17.89 | 1.08447 | <a href="#">link</a> |
|                                                                                                              | LFISTA        | 0.00602 | 0.00681 | 0.03861 | 42.82 | 23.62 | 1.08581 | <a href="#">link</a> |
|                                                                                                              | LFISTA-SHARP  | 0.00698 | 0.00815 | 0.05130 | 38.88 | 17.74 | 0.86957 | <a href="#">link</a> |
| Old Norse Vikings Festival (1927) - Britain on Film (Total duration of 1 min 6 sec divided into 4 sequences) | Original      | 0.00724 | 0.01126 | 0.02988 | 54.85 | 19.59 | 1.00000 | <a href="#">link</a> |
|                                                                                                              | OldPhoto + TS | 0.00831 | 0.01158 | 0.04094 | 43.61 | 14.66 | 0.91406 | <a href="#">link</a> |
|                                                                                                              | Deepremaster  | 0.00841 | 0.01229 | 0.03117 | 54.85 | 19.59 | 0.95918 | <a href="#">link</a> |
|                                                                                                              | NeatVideo     | 0.00531 | 0.00814 | 0.02239 | 55.93 | 19.89 | 1.15724 | <a href="#">link</a> |
|                                                                                                              | RTN           | 0.00821 | 0.01068 | 0.03753 | 35.83 | 19.05 | 0.78252 | <a href="#">link</a> |
|                                                                                                              | NFFA          | 0.00342 | 0.00935 | 0.04524 | 42.35 | 18.34 | 1.95324 | <a href="#">link</a> |
|                                                                                                              | LFISTA        | 0.00535 | 0.00819 | 0.02005 | 52.97 | 20.03 | 1.17650 | <a href="#">link</a> |
|                                                                                                              | LFISTA-SHARP  | 0.00624 | 0.00867 | 0.02361 | 53.07 | 14.76 | 0.87038 | <a href="#">link</a> |
| St. Andrew's Wells (1920) (Total duration of 9 min 23 sec divided into 20 sequences)                         | Original      | 0.00480 | 0.00666 | 0.02836 | 46.68 | 20.94 | 1.00000 | <a href="#">link</a> |
|                                                                                                              | OldPhoto + TS | 0.00675 | 0.00886 | 0.03109 | 43.88 | 15.36 | 0.78870 | <a href="#">link</a> |
|                                                                                                              | Deepremaster  | 0.00589 | 0.00873 | 0.02648 | 59.69 | 20.96 | 0.90276 | <a href="#">link</a> |
|                                                                                                              | NeatVideo     | 0.00303 | 0.00461 | 0.01320 | 66.13 | 21.40 | 1.08616 | <a href="#">link</a> |
|                                                                                                              | RTN           | 0.00706 | 0.00901 | 0.02883 | 63.17 | 20.25 | 0.89063 | <a href="#">link</a> |
|                                                                                                              | NFFA          | 0.00314 | 0.00446 | 0.01066 | 75.82 | 17.52 | 2.22192 | <a href="#">link</a> |
|                                                                                                              | LFISTA        | 0.00343 | 0.00479 | 0.01278 | 67.82 | 21.24 | 1.12401 | <a href="#">link</a> |
|                                                                                                              | LFISTA-SHARP  | 0.00483 | 0.00684 | 0.01750 | 54.92 | 15.85 | 0.93678 | <a href="#">link</a> |
| Wedding of Miss Carrie Alexander, Faversham 1913 (Total duration of 3 min 59 sec divided into 15 sequences)  | Original      | 0.00783 | 0.01248 | 0.04102 | 38.35 | 20.38 | 1.00000 | <a href="#">link</a> |
|                                                                                                              | OldPhoto + TS | 0.00818 | 0.01170 | 0.05849 | 33.64 | 14.86 | 0.90821 | <a href="#">link</a> |
|                                                                                                              | Deepremaster  | 0.00853 | 0.01272 | 0.05187 | 38.35 | 20.38 | 0.94495 | <a href="#">link</a> |
|                                                                                                              | NeatVideo     | 0.00607 | 0.00968 | 0.03228 | 46.01 | 20.78 | 1.03253 | <a href="#">link</a> |
|                                                                                                              | RTN           | 0.00941 | 0.01193 | 0.05800 | 30.39 | 19.30 | 0.76856 | <a href="#">link</a> |
|                                                                                                              | NFFA          | 0.00471 | 0.00693 | 0.03692 | 42.01 | 15.30 | 2.26568 | <a href="#">link</a> |
|                                                                                                              | LFISTA        | 0.00578 | 0.00886 | 0.03215 | 43.38 | 20.67 | 1.09870 | <a href="#">link</a> |
|                                                                                                              | LFISTA-SHARP  | 0.00672 | 0.00974 | 0.04536 | 44.04 | 15.07 | 0.86946 | <a href="#">link</a> |
| New Zealanders Win At Rugby (1916) - Britain on Film Sequence 1                                              | Original      | 0.00731 | 0.01037 | 0.01839 | 40.46 | 20.13 | 1.00000 | <a href="#">link</a> |
|                                                                                                              | OldPhoto + TS | 0.00839 | 0.01085 | 0.02517 | 27.53 | 13.08 | 0.90075 | <a href="#">link</a> |
|                                                                                                              | Deepremaster  | 0.00772 | 0.01110 | 0.01714 | 36.15 | 20.33 | 0.87210 | <a href="#">link</a> |
|                                                                                                              | NeatVideo     | 0.00460 | 0.00737 | 0.01357 | 41.68 | 20.22 | 1.47734 | <a href="#">link</a> |
|                                                                                                              | RTN           | 0.00886 | 0.01082 | 0.02822 | 19.22 | 19.91 | 0.77250 | <a href="#">link</a> |
|                                                                                                              | NFFA          | 0.00478 | 0.00614 | 0.01821 | 39.38 | 15.41 | 1.89204 | <a href="#">link</a> |
|                                                                                                              | LFISTA        | 0.00438 | 0.00663 | 0.01024 | 38.45 | 20.20 | 1.64308 | <a href="#">link</a> |

|                                                                 |               |         |         |         |       |       |         |                      |
|-----------------------------------------------------------------|---------------|---------|---------|---------|-------|-------|---------|----------------------|
|                                                                 | LFISTA-SHARP  | 0.00614 | 0.00845 | 0.01178 | 39.55 | 13.75 | 1.16966 | <a href="#">link</a> |
| New Zealanders Win At Rugby (1916) - Britain on Film Sequence 2 | Original      | 0.00659 | 0.00994 | 0.02161 | 41.94 | 20.67 | 1.00000 | <a href="#">link</a> |
|                                                                 | OldPhoto + TS | 0.00812 | 0.01079 | 0.02945 | 26.87 | 14.96 | 0.81714 | <a href="#">link</a> |
|                                                                 | Deepremaster  | 0.00730 | 0.01060 | 0.02030 | 38.15 | 20.62 | 0.95685 | <a href="#">link</a> |
|                                                                 | NeatVideo     | 0.00452 | 0.00678 | 0.01774 | 43.53 | 20.72 | 1.23579 | <a href="#">link</a> |
|                                                                 | RTN           | 0.00897 | 0.01071 | 0.03180 | 20.12 | 20.77 | 0.64280 | <a href="#">link</a> |
|                                                                 | NFFA          | 0.00543 | 0.00705 | 0.02460 | 38.13 | 16.23 | 1.15081 | <a href="#">link</a> |
|                                                                 | LFISTA        | 0.00464 | 0.00664 | 0.01421 | 40.22 | 20.54 | 1.34741 | <a href="#">link</a> |
|                                                                 | LFISTA-SHARP  | 0.00643 | 0.00850 | 0.01634 | 39.45 | 15.26 | 0.89828 | <a href="#">link</a> |
| Round the Wirral with a Movie Camera (1934) Sequence 1          | Original      | 0.00937 | 0.01058 | 0.05061 | 44.55 | 18.95 | 1.00000 | <a href="#">link</a> |
|                                                                 | OldPhoto + TS | 0.00806 | 0.00936 | 0.06387 | 46.19 | 16.34 | 1.02347 | <a href="#">link</a> |
|                                                                 | Deepremaster  | 0.00806 | 0.01003 | 0.04004 | 39.35 | 22.19 | 1.00013 | <a href="#">link</a> |
|                                                                 | NeatVideo     | 0.00470 | 0.00612 | 0.03231 | 50.13 | 22.65 | 1.19531 | <a href="#">link</a> |
|                                                                 | RTN           | 0.00917 | 0.01042 | 0.05190 | 33.65 | 23.13 | 0.89387 | <a href="#">link</a> |
|                                                                 | NFFA          | 0.00466 | 0.00584 | 0.03340 | 42.34 | 17.35 | 2.28079 | <a href="#">link</a> |
|                                                                 | LFISTA        | 0.00493 | 0.00631 | 0.02071 | 47.83 | 22.75 | 1.77048 | <a href="#">link</a> |
|                                                                 | LFISTA-SHARP  | 0.00595 | 0.00746 | 0.02387 | 49.21 | 13.43 | 1.35691 | <a href="#">link</a> |
| Round the Wirral with a Movie Camera (1934) Sequence 2          | Original      | 0.00788 | 0.00974 | 0.05494 | 37.86 | 18.82 | 1.00000 | <a href="#">link</a> |
|                                                                 | OldPhoto + TS | 0.00749 | 0.00909 | 0.06142 | 45.88 | 14.37 | 1.11008 | <a href="#">link</a> |
|                                                                 | Deepremaster  | 0.00823 | 0.01095 | 0.04825 | 37.01 | 19.95 | 0.96934 | <a href="#">link</a> |
|                                                                 | NeatVideo     | 0.00529 | 0.00662 | 0.04308 | 40.63 | 20.36 | 1.30269 | <a href="#">link</a> |
|                                                                 | RTN           | 0.00922 | 0.01039 | 0.06163 | 48.14 | 20.20 | 0.77131 | <a href="#">link</a> |
|                                                                 | NFFA          | 0.00459 | 0.00596 | 0.03502 | 43.92 | 16.20 | 1.84327 | <a href="#">link</a> |
|                                                                 | LFISTA        | 0.00535 | 0.00683 | 0.03252 | 40.54 | 20.07 | 1.37521 | <a href="#">link</a> |
|                                                                 | LFISTA-SHARP  | 0.00646 | 0.00800 | 0.03953 | 39.39 | 13.29 | 1.03091 | <a href="#">link</a> |
| The Kiss in the Tunnel (BFI National Archive)                   | Original      | 0.00705 | 0.01195 | 0.07099 | 43.54 | 20.42 | 1.00000 | <a href="#">link</a> |
|                                                                 | OldPhoto + TS | 0.00868 | 0.01300 | 0.08410 | 17.83 | 17.13 | 0.81189 | <a href="#">link</a> |
|                                                                 | Deepremaster  | 0.00885 | 0.01251 | 0.07146 | 38.01 | 20.54 | 0.98911 | <a href="#">link</a> |
|                                                                 | NeatVideo     | 0.00609 | 0.00907 | 0.04080 | 40.55 | 21.59 | 1.17375 | <a href="#">link</a> |
|                                                                 | RTN           | 0.00964 | 0.01180 | 0.06094 | 30.53 | 21.00 | 0.71899 | <a href="#">link</a> |
|                                                                 | NFFA          | 0.00749 | 0.00906 | 0.10538 | 30.57 | 18.88 | 1.75659 | <a href="#">link</a> |
|                                                                 | LFISTA        | 0.00581 | 0.00838 | 0.03179 | 39.52 | 19.90 | 1.26722 | <a href="#">link</a> |
|                                                                 | LFISTA-SHARP  | 0.00692 | 0.00957 | 0.03380 | 31.45 | 17.03 | 0.89180 | <a href="#">link</a> |
| Indian song 2 (color video)                                     | Original      | 0.00535 | 0.01111 | 0.02937 | 51.81 | 22.83 | 1.00000 | <a href="#">link</a> |
|                                                                 | OldPhoto + TS | 0.00788 | 0.01043 | 0.04409 | 44.20 | 16.03 | 0.96605 | <a href="#">link</a> |
|                                                                 | Deepremaster  | 0.00891 | 0.01122 | 0.03012 | 53.02 | 23.01 | 0.92529 | <a href="#">link</a> |
|                                                                 | NeatVideo     | 0.00471 | 0.01297 | 0.02181 | 54.82 | 22.88 | 1.03584 | <a href="#">link</a> |
|                                                                 | RTN           | 0.00706 | 0.01264 | 0.04920 | 29.81 | 22.00 | 0.83803 | <a href="#">link</a> |
|                                                                 | NFFA          | 0.00692 | 0.01153 | 0.03831 | 47.24 | 22.31 | 1.15552 | <a href="#">link</a> |
|                                                                 | LFISTA        | 0.00552 | 0.01139 | 0.02546 | 61.63 | 22.52 | 1.10329 | <a href="#">link</a> |
|                                                                 | LFISTA-SHARP  | 0.00568 | 0.00973 | 0.03493 | 58.03 | 17.68 | 1.01544 | <a href="#">link</a> |

|                                     |                   |            |          |         |         |         |       |         |         |   |
|-------------------------------------|-------------------|------------|----------|---------|---------|---------|-------|---------|---------|---|
| Atlas                               | 1907<br>001.mp4   | Canada     | Original | 0.00656 | 0.00963 | 0.04941 | 53.14 | 15.33   | 1.00000 | - |
|                                     |                   |            | NFFA     | 0.00567 | 0.00804 | 0.05193 | 60.05 | 16.54   | 1.31205 | - |
|                                     |                   |            | LFISTA   | 0.00596 | 0.00795 | 0.02978 | 52.51 | 13.55   | 1.11208 | - |
|                                     | 1907<br>002.mp4   | Canada     | Original | 0.00655 | 0.00990 | 0.03896 | 42.25 | 15.87   | 1.00000 | - |
|                                     |                   |            | NFFA     | 0.00522 | 0.00722 | 0.04537 | 52.25 | 18.09   | 1.40957 | - |
|                                     |                   |            | LFISTA   | 0.00618 | 0.00826 | 0.03330 | 43.27 | 13.83   | 1.07833 | - |
|                                     | 1928<br>001.mp4   | Manchester | Original | 0.00338 | 0.00660 | 0.01119 | 69.95 | 17.50   | 1.00000 | - |
|                                     |                   |            | NFFA     | 0.00293 | 0.00456 | 0.01538 | 68.61 | 16.37   | 1.10633 | - |
|                                     |                   |            | LFISTA   | 0.00327 | 0.00512 | 0.00899 | 67.39 | 17.91   | 1.25818 | - |
|                                     | 97377 001.mp4     |            | Original | 0.01031 | 0.01261 | 0.16277 | 46.09 | 16.62   | 1.00000 | - |
|                                     |                   |            | NFFA     | 0.00623 | 0.00782 | 0.08886 | 55.23 | 16.36   | 0.96032 | - |
|                                     |                   |            | LFISTA   | 0.00569 | 0.00667 | 0.05563 | 63.81 | 16.42   | 1.12171 | - |
|                                     | 97377 002.mp4     |            | Original | 0.00755 | 0.01224 | 0.14563 | 64.87 | 17.74   | 1.00000 | - |
|                                     |                   |            | NFFA     | 0.00448 | 0.00844 | 0.09901 | 66.66 | 15.54   | 1.47109 | - |
|                                     |                   |            | LFISTA   | 0.00524 | 0.00680 | 0.04370 | 82.17 | 17.30   | 1.13870 | - |
|                                     | 97377 003.mp4     |            | Original | 0.00920 | 0.01208 | 0.12446 | 47.69 | 20.66   | 1.00000 | - |
|                                     |                   |            | NFFA     | 0.00561 | 0.00712 | 0.05758 | 53.96 | 17.06   | 1.20441 | - |
|                                     |                   |            | LFISTA   | 0.00632 | 0.00686 | 0.05572 | 56.15 | 16.69   | 1.07617 | - |
|                                     | 97377 004.mp4     |            | Original | 0.00983 | 0.01266 | 0.08101 | 38.41 | 16.48   | 1.00000 | - |
|                                     |                   |            | NFFA     | 0.00758 | 0.00943 | 0.07279 | 43.06 | 15.47   | 0.51097 | - |
|                                     |                   |            | LFISTA   | 0.00519 | 0.00679 | 0.03835 | 49.97 | 16.38   | 1.03681 | - |
|                                     | africa<br>001.mp4 | speaks     | Original | 0.00799 | 0.01100 | 0.07598 | 48.83 | 20.39   | 1.00000 | - |
|                                     |                   |            | NFFA     | 0.00588 | 0.00776 | 0.07315 | 51.22 | 17.75   | 1.58463 | - |
|                                     |                   |            | LFISTA   | 0.00428 | 0.00624 | 0.02958 | 54.75 | 16.33   | 1.53632 | - |
|                                     | africa<br>002.mp4 | speaks     | Original | 0.00717 | 0.01057 | 0.07941 | 49.47 | 16.17   | 1.00000 | - |
|                                     |                   |            | NFFA     | 0.00471 | 0.00605 | 0.07084 | 51.98 | 18.48   | 1.10735 | - |
|                                     |                   |            | LFISTA   | 0.00568 | 0.00788 | 0.04136 | 49.82 | 14.76   | 1.15204 | - |
| africa<br>003.mp4                   | speaks            | Original   | 0.00703  | 0.01024 | 0.04267 | 50.30   | 19.04 | 1.00000 | -       |   |
|                                     |                   | NFFA       | 0.00430  | 0.00572 | 0.03252 | 52.07   | 16.82 | 1.92371 | -       |   |
|                                     |                   | LFISTA     | 0.00342  | 0.00497 | 0.01434 | 54.40   | 15.13 | 1.70497 | -       |   |
| africa<br>004.mp4                   | speaks            | Original   | 0.00938  | 0.01358 | 0.06373 | 49.35   | 26.13 | 1.00000 | -       |   |
|                                     |                   | NFFA       | 0.00709  | 0.01061 | 0.06413 | 51.06   | 23.73 | 1.09605 | -       |   |
|                                     |                   | LFISTA     | 0.00462  | 0.00694 | 0.02846 | 59.94   | 22.18 | 1.22829 | -       |   |
| africa<br>005.mp4                   | speaks            | Original   | 0.01563  | 0.01912 | 0.15502 | 42.99   | 33.84 | 1.00000 | -       |   |
|                                     |                   | NFFA       | 0.01403  | 0.01730 | 0.13652 | 44.90   | 32.27 | 1.23531 | -       |   |
|                                     |                   | LFISTA     | 0.00909  | 0.01158 | 0.07958 | 55.63   | 25.57 | 1.11964 | -       |   |
| Around the world in<br>1896 001.mp4 |                   | Original   | 0.00757  | 0.01191 | 0.02822 | 56.66   | 16.06 | 1.00000 | -       |   |
|                                     |                   | NFFA       | 0.00636  | 0.00871 | 0.03808 | 60.42   | 16.48 | 1.38117 | -       |   |
|                                     |                   | LFISTA     | 0.00573  | 0.00942 | 0.01553 | 54.64   | 16.49 | 1.63312 | -       |   |
| Around the world in<br>1896 002.mp4 |                   | Original   | 0.00583  | 0.00902 | 0.01604 | 55.45   | 18.74 | 1.00000 | -       |   |
|                                     |                   | NFFA       | 0.00474  | 0.00624 | 0.02129 | 56.41   | 17.65 | 1.30430 | -       |   |
|                                     |                   | LFISTA     | 0.00430  | 0.00615 | 0.01161 | 56.40   | 18.65 | 1.20295 | -       |   |

|                               |          |         |         |         |       |       |         |   |
|-------------------------------|----------|---------|---------|---------|-------|-------|---------|---|
| born to the saddle<br>001.mp4 | Original | 0.00738 | 0.01039 | 0.03702 | 48.21 | 22.01 | 1.00000 | - |
|                               | NFFA     | 0.00669 | 0.00919 | 0.04952 | 52.67 | 20.77 | 0.98386 | - |
|                               | LFISTA   | 0.00661 | 0.00890 | 0.02226 | 49.14 | 20.76 | 1.16437 | - |
| born to the saddle<br>002.mp4 | Original | 0.00768 | 0.00987 | 0.06188 | 47.28 | 15.27 | 1.00000 | - |
|                               | NFFA     | 0.00665 | 0.00884 | 0.05388 | 48.25 | 15.41 | 1.19333 | - |
|                               | LFISTA   | 0.00666 | 0.00856 | 0.02388 | 44.56 | 15.40 | 1.06856 | - |
| CHRISTMAS 1932<br>001.mp4     | Original | 0.00770 | 0.00980 | 0.04614 | 45.52 | 18.65 | 1.00000 | - |
|                               | NFFA     | 0.00626 | 0.00846 | 0.05160 | 50.71 | 18.71 | 1.08206 | - |
|                               | LFISTA   | 0.00630 | 0.00806 | 0.03442 | 46.52 | 18.74 | 1.06803 | - |
| CHRISTMAS 1932<br>002.mp4     | Original | 0.00731 | 0.00979 | 0.05395 | 52.36 | 17.61 | 1.00000 | - |
|                               | NFFA     | 0.00645 | 0.00832 | 0.06911 | 56.40 | 17.17 | 1.05773 | - |
|                               | LFISTA   | 0.00670 | 0.00868 | 0.04531 | 52.19 | 16.43 | 1.03796 | - |
| CHRISTMAS 1932<br>003.mp4     | Original | 0.00734 | 0.00975 | 0.04546 | 42.50 | 18.07 | 1.00000 | - |
|                               | NFFA     | 0.00643 | 0.00969 | 0.05618 | 48.98 | 17.74 | 1.00560 | - |
|                               | LFISTA   | 0.00640 | 0.00787 | 0.03186 | 44.30 | 18.23 | 1.07297 | - |
| danger ahead<br>001.mp4       | Original | 0.01089 | 0.01440 | 0.04271 | 41.25 | 26.76 | 1.00000 | - |
|                               | NFFA     | 0.00822 | 0.01069 | 0.04418 | 42.05 | 28.30 | 1.28042 | - |
|                               | LFISTA   | 0.00478 | 0.00715 | 0.01426 | 45.42 | 27.07 | 1.77432 | - |
| danger ahead<br>002.mp4       | Original | 0.01368 | 0.01685 | 0.12669 | 42.45 | 18.22 | 1.00000 | - |
|                               | NFFA     | 0.01407 | 0.01830 | 0.11298 | 42.95 | 24.19 | 0.98231 | - |
|                               | LFISTA   | 0.01155 | 0.01362 | 0.08778 | 46.09 | 17.51 | 1.06368 | - |
| danger ahead<br>003.mp4       | Original | 0.00963 | 0.01357 | 0.04641 | 36.61 | 22.03 | 1.00000 | - |
|                               | NFFA     | 0.00727 | 0.01010 | 0.04324 | 37.72 | 22.37 | 1.17014 | - |
|                               | LFISTA   | 0.00778 | 0.01064 | 0.03397 | 37.21 | 21.38 | 1.18385 | - |
| danger ahead<br>004.mp4       | Original | 0.01077 | 0.01323 | 0.05223 | 41.27 | 19.97 | 1.00000 | - |
|                               | NFFA     | 0.01205 | 0.01652 | 0.08719 | 44.52 | 21.38 | 0.63058 | - |
|                               | LFISTA   | 0.00832 | 0.01061 | 0.03139 | 42.08 | 18.91 | 1.07064 | - |
| Die 001.mp4                   | Original | 0.01181 | 0.01278 | 0.05411 | 34.48 | 20.29 | 1.00000 | - |
|                               | NFFA     | 0.00528 | 0.00653 | 0.04732 | 39.19 | 20.68 | 1.62794 | - |
|                               | LFISTA   | 0.00476 | 0.00598 | 0.02513 | 39.55 | 17.51 | 1.36538 | - |
| Die 002.mp4                   | Original | 0.01831 | 0.01940 | 0.13488 | 48.19 | 21.26 | 1.00000 | - |
|                               | NFFA     | 0.00507 | 0.00638 | 0.08072 | 52.59 | 18.90 | 2.76358 | - |
|                               | LFISTA   | 0.00619 | 0.00884 | 0.03672 | 64.35 | 14.80 | 1.99030 | - |
| Die 003.mp4                   | Original | 0.01945 | 0.02061 | 0.14431 | 45.44 | 22.73 | 1.00000 | - |
|                               | NFFA     | 0.00567 | 0.00705 | 0.10667 | 49.79 | 18.12 | 2.85076 | - |
|                               | LFISTA   | 0.00620 | 0.00866 | 0.04015 | 62.04 | 15.40 | 2.12312 | - |
| HOF 001.mp4                   | Original | 0.01359 | 0.01634 | 0.10772 | 30.20 | 15.46 | 1.00000 | - |
|                               | NFFA     | 0.01080 | 0.01398 | 0.10083 | 37.52 | 16.85 | 1.06046 | - |
|                               | LFISTA   | 0.00770 | 0.01004 | 0.06656 | 50.39 | 18.07 | 1.05154 | - |
| HOF 2 001.mp4                 | Original | 0.01751 | 0.01844 | 0.16415 | 15.90 | 16.33 | 1.00000 | - |
|                               | NFFA     | 0.00991 | 0.01278 | 0.09328 | 18.92 | 18.41 | 0.91674 | - |
|                               | LFISTA   | 0.00629 | 0.00819 | 0.06323 | 45.15 | 18.69 | 1.10806 | - |
| HOF 2 002.mp4                 | Original | 0.01397 | 0.01602 | 0.14445 | 19.54 | 12.60 | 1.00000 | - |
|                               | NFFA     | 0.01027 | 0.01456 | 0.11648 | 27.91 | 14.58 | 1.07767 | - |

|                            |          |         |         |         |       |       |         |   |
|----------------------------|----------|---------|---------|---------|-------|-------|---------|---|
|                            | LFISTA   | 0.00889 | 0.01059 | 0.07942 | 51.09 | 18.44 | 1.04599 | - |
| HOF 2 003.mp4              | Original | 0.01439 | 0.01378 | 0.13499 | 50.44 | 12.16 | 1.00000 | - |
|                            | NFFA     | 0.00502 | 0.00577 | 0.08117 | 53.90 | 12.02 | 1.30126 | - |
|                            | LFISTA   | 0.00707 | 0.00840 | 0.05306 | 55.12 | 17.73 | 1.17605 | - |
| HOF 2 004.mp4              | Original | 0.01347 | 0.01528 | 0.13841 | 27.81 | 14.07 | 1.00000 | - |
|                            | NFFA     | 0.01014 | 0.01306 | 0.11866 | 34.87 | 16.39 | 1.18384 | - |
|                            | LFISTA   | 0.00748 | 0.00906 | 0.07995 | 53.21 | 16.22 | 1.03620 | - |
| HOF 2 005.mp4              | Original | 0.01634 | 0.01806 | 0.18749 | 28.37 | 14.49 | 1.00000 | - |
|                            | NFFA     | 0.01023 | 0.01327 | 0.18524 | 40.51 | 16.30 | 1.48768 | - |
|                            | LFISTA   | 0.00694 | 0.00895 | 0.09100 | 61.43 | 15.72 | 1.42178 | - |
| HOF 2 006.mp4              | Original | 0.01171 | 0.01265 | 0.17687 | 23.87 | 18.27 | 1.00000 | - |
|                            | NFFA     | 0.00897 | 0.01150 | 0.13411 | 30.83 | 20.89 | 1.01547 | - |
|                            | LFISTA   | 0.00523 | 0.00604 | 0.07336 | 55.58 | 18.55 | 1.01421 | - |
| HOF 2 007.mp4              | Original | 0.01281 | 0.01429 | 0.20788 | 24.37 | 12.75 | 1.00000 | - |
|                            | NFFA     | 0.00782 | 0.01055 | 0.12501 | 34.17 | 16.55 | 0.46386 | - |
|                            | LFISTA   | 0.00678 | 0.00744 | 0.10172 | 53.14 | 18.67 | 1.14741 | - |
| HOF 2 008.mp4              | Original | 0.01466 | 0.01722 | 0.14806 | 14.09 | 18.31 | 1.00000 | - |
|                            | NFFA     | 0.01081 | 0.01275 | 0.12739 | 16.36 | 21.22 | 0.84228 | - |
|                            | LFISTA   | 0.00790 | 0.01117 | 0.05851 | 40.83 | 21.36 | 1.04698 | - |
| HOF 3 001.mp4              | Original | 0.01098 | 0.01406 | 0.07749 | 37.65 | 17.16 | 1.00000 | - |
|                            | NFFA     | 0.00624 | 0.00777 | 0.05479 | 38.57 | 18.66 | 1.02559 | - |
|                            | LFISTA   | 0.00799 | 0.01183 | 0.03591 | 42.58 | 20.94 | 1.08173 | - |
| HOF 3 002.mp4              | Original | 0.01702 | 0.01755 | 0.13910 | 6.81  | 13.96 | 1.00000 | - |
|                            | NFFA     | 0.01093 | 0.01334 | 0.11227 | 6.06  | 15.37 | 1.00801 | - |
|                            | LFISTA   | 0.00625 | 0.00753 | 0.05230 | 41.40 | 18.21 | 1.13110 | - |
| HOF 3 003.mp4              | Original | 0.01617 | 0.01684 | 0.15215 | 7.59  | 14.47 | 1.00000 | - |
|                            | NFFA     | 0.01101 | 0.01323 | 0.12487 | 3.39  | 15.91 | 1.22096 | - |
|                            | LFISTA   | 0.00544 | 0.00662 | 0.04443 | 36.17 | 20.41 | 1.90534 | - |
| IA 35000011 001<br>001.mp4 | Original | 0.00749 | 0.00889 | 0.06956 | 42.99 | 17.87 | 1.00000 | - |
|                            | NFFA     | 0.00702 | 0.00923 | 0.07894 | 44.95 | 16.47 | 1.17441 | - |
|                            | LFISTA   | 0.00645 | 0.00730 | 0.05454 | 49.74 | 15.96 | 1.00591 | - |
| Lagent 001.mp4             | Original | 0.01087 | 0.01580 | 0.03281 | 43.56 | 20.03 | 1.00000 | - |
|                            | NFFA     | 0.00669 | 0.00890 | 0.02692 | 44.89 | 20.28 | 4.73668 | - |
|                            | LFISTA   | 0.00677 | 0.01036 | 0.01319 | 51.43 | 16.61 | 2.28647 | - |
| Lagent 002.mp4             | Original | 0.00861 | 0.01227 | 0.02064 | 44.16 | 22.87 | 1.00000 | - |
|                            | NFFA     | 0.00617 | 0.00825 | 0.02180 | 45.12 | 23.22 | 1.49480 | - |
|                            | LFISTA   | 0.00471 | 0.00684 | 0.01079 | 44.71 | 21.67 | 1.45318 | - |
| Lagent 003.mp4             | Original | 0.00886 | 0.01319 | 0.02224 | 32.66 | 18.63 | 1.00000 | - |
|                            | NFFA     | 0.00582 | 0.00750 | 0.02290 | 34.83 | 17.72 | 1.29914 | - |
|                            | LFISTA   | 0.00576 | 0.00903 | 0.01377 | 33.24 | 16.58 | 1.48611 | - |
| Lagent 004.mp4             | Original | 0.00852 | 0.01305 | 0.02382 | 37.90 | 22.81 | 1.00000 | - |
|                            | NFFA     | 0.00593 | 0.00832 | 0.02638 | 39.21 | 21.29 | 1.64946 | - |
|                            | LFISTA   | 0.00513 | 0.00803 | 0.01442 | 40.31 | 21.02 | 1.60354 | - |
| Lagent 005.mp4             | Original | 0.01013 | 0.01332 | 0.05195 | 45.68 | 24.16 | 1.00000 | - |
|                            | NFFA     | 0.00819 | 0.01059 | 0.05497 | 46.71 | 23.45 | 1.22579 | - |
|                            | LFISTA   | 0.00569 | 0.00827 | 0.02073 | 48.59 | 21.38 | 1.73138 | - |
| Lagent 006.mp4             | Original | 0.00789 | 0.01217 | 0.02076 | 54.08 | 21.13 | 1.00000 | - |
|                            | NFFA     | 0.00531 | 0.00691 | 0.01967 | 55.76 | 21.32 | 1.91077 | - |
|                            | LFISTA   | 0.00450 | 0.00684 | 0.01176 | 60.48 | 18.27 | 1.57985 | - |
| Lagent 007.mp4             | Original | 0.00833 | 0.01180 | 0.01970 | 42.24 | 21.89 | 1.00000 | - |
|                            | NFFA     | 0.00562 | 0.00734 | 0.01901 | 41.95 | 21.50 | 1.62098 | - |
|                            | LFISTA   | 0.00451 | 0.00704 | 0.00873 | 50.89 | 16.87 | 1.90928 | - |



|                                     |          |         |         |         |       |       |         |   |
|-------------------------------------|----------|---------|---------|---------|-------|-------|---------|---|
| Scarlet Street<br>001.mp4           | Original | 0.00610 | 0.00843 | 0.01915 | 49.34 | 18.55 | 1.00000 | - |
|                                     | NFFA     | 0.00427 | 0.00571 | 0.01471 | 50.70 | 19.47 | 1.64251 | - |
|                                     | LFISTA   | 0.00401 | 0.00523 | 0.00959 | 50.51 | 15.64 | 1.37280 | - |
| SGL 4 001.mp4                       | Original | 0.00950 | 0.01289 | 0.08031 | 31.18 | 18.68 | 1.00000 | - |
|                                     | NFFA     | 0.01095 | 0.04513 | 0.06774 | 33.54 | 18.74 | 0.68892 | - |
|                                     | LFISTA   | 0.00722 | 0.01550 | 0.04324 | 31.89 | 17.10 | 1.04968 | - |
| SGL 4 002.mp4                       | Original | 0.01837 | 0.02159 | 0.06880 | 29.72 | 17.44 | 1.00000 | - |
|                                     | NFFA     | 0.02163 | 0.03015 | 0.06468 | 46.28 | 17.35 | 1.05982 | - |
|                                     | LFISTA   | 0.01423 | 0.01593 | 0.05510 | 33.47 | 16.96 | 1.05985 | - |
| SGL 4 003.mp4                       | Original | 0.01343 | 0.01693 | 0.11222 | 36.67 | 18.56 | 1.00000 | - |
|                                     | NFFA     | 0.00924 | 0.01282 | 0.10144 | 45.11 | 17.19 | 1.04376 | - |
|                                     | LFISTA   | 0.00939 | 0.01236 | 0.08714 | 42.66 | 15.60 | 1.13837 | - |
| SGL 4 004.mp4                       | Original | 0.00744 | 0.01013 | 0.08181 | 33.53 | 16.08 | 1.00000 | - |
|                                     | NFFA     | 0.00528 | 0.00742 | 0.05166 | 40.52 | 15.56 | 1.52285 | - |
|                                     | LFISTA   | 0.00518 | 0.00699 | 0.03397 | 42.42 | 15.85 | 1.16996 | - |
| TheFrontPage1931<br>001.mp4         | Original | 0.00620 | 0.00867 | 0.01950 | 57.95 | 18.64 | 1.00000 | - |
|                                     | NFFA     | 0.00457 | 0.00624 | 0.01708 | 61.86 | 18.57 | 0.83515 | - |
|                                     | LFISTA   | 0.00326 | 0.00487 | 0.00984 | 66.01 | 14.67 | 1.47641 | - |
| TheGoodforNothing<br>001.mp4        | Original | 0.01029 | 0.01325 | 0.04730 | 27.40 | 16.63 | 1.00000 | - |
|                                     | NFFA     | 0.00781 | 0.01011 | 0.05118 | 29.10 | 16.39 | 1.03019 | - |
|                                     | LFISTA   | 0.00566 | 0.00729 | 0.02576 | 38.37 | 14.48 | 1.22978 | - |
| Winter Scenes in<br>Holland 001.mp4 | Original | 0.00734 | 0.00975 | 0.04546 | 42.50 | 18.07 | 1.00000 | - |
|                                     | NFFA     | 0.00646 | 0.00969 | 0.05756 | 48.68 | 17.19 | 0.99821 | - |
|                                     | LFISTA   | 0.00640 | 0.00787 | 0.03186 | 44.30 | 18.23 | 1.07297 | - |
| Winter Scenes in<br>Holland 002.mp4 | Original | 0.00770 | 0.00980 | 0.04614 | 45.52 | 18.65 | 1.00000 | - |
|                                     | NFFA     | 0.00616 | 0.00839 | 0.05163 | 50.74 | 18.98 | 1.12887 | - |
|                                     | LFISTA   | 0.00630 | 0.00806 | 0.03442 | 46.52 | 18.74 | 1.06803 | - |
| Winter Scenes in<br>Holland 003.mp4 | Original | 0.00694 | 0.01029 | 0.03109 | 45.68 | 15.30 | 1.00000 | - |
|                                     | NFFA     | 0.00570 | 0.00812 | 0.03252 | 48.59 | 15.76 | 0.78119 | - |
|                                     | LFISTA   | 0.00525 | 0.00772 | 0.01640 | 49.14 | 14.75 | 1.13670 | - |
| Winter Scenes in<br>Holland 004.mp4 | Original | 0.00799 | 0.01156 | 0.05276 | 50.02 | 16.01 | 1.00000 | - |
|                                     | NFFA     | 0.00601 | 0.00830 | 0.06094 | 58.46 | 18.14 | 1.61320 | - |
|                                     | LFISTA   | 0.00526 | 0.00778 | 0.01860 | 54.57 | 15.78 | 1.80398 | - |
| Winter Scenes in<br>Holland 005.mp4 | Original | 0.00997 | 0.01504 | 0.04406 | 36.05 | 17.97 | 1.00000 | - |
|                                     | NFFA     | 0.00790 | 0.01105 | 0.05589 | 36.22 | 18.10 | 1.07171 | - |
|                                     | LFISTA   | 0.00750 | 0.01106 | 0.01998 | 36.76 | 15.72 | 1.19862 | - |
| Winter Scenes in<br>Holland 006.mp4 | Original | 0.00828 | 0.01197 | 0.05091 | 44.26 | 14.47 | 1.00000 | - |
|                                     | NFFA     | 0.00670 | 0.00919 | 0.06491 | 49.94 | 15.75 | 0.94599 | - |
|                                     | LFISTA   | 0.00682 | 0.00908 | 0.03559 | 45.90 | 14.51 | 1.33872 | - |
| Winter Scenes in<br>Holland 007.mp4 | Original | 0.00749 | 0.00946 | 0.06015 | 52.08 | 17.65 | 1.00000 | - |
|                                     | NFFA     | 0.00646 | 0.00829 | 0.06970 | 56.30 | 17.16 | 1.03692 | - |
|                                     | LFISTA   | 0.00676 | 0.00845 | 0.05126 | 53.24 | 16.09 | 1.04254 | - |

## References

- [1] G. Eilertsen, R. Mantiuk, and J. Unger. Single-frame regularization for temporally stable cnns. In *Proceedings of the IEEE/CVF Conference on Computer Vision and Pattern Recognition*, pages 11176–11185, 2019. 3
- [2] S. Iizuka and E. Simo-Serra. Deepremaster: Temporal source-reference attention networks for comprehensive video enhancement. *ACM Trans. Graph.*, 38(6), 2019. 1, 2, 3
- [3] W.-S. Lai, J.-B. Huang, O. Wang, E. Shechtman, E. Yumer, and M.-H. Yang. Learning blind video temporal consistency. In *ECCV*, 2018. 1, 3
- [4] C. Lei, X. Ren, Z. Zhang, and Q. Chen. Blind video deflickering by neural filtering with a flawed atlas. In *CVPR*, 2023. 3
- [5] A. Mittal, A.K. Moorthy, and A. C. Bovik. Blind/referenceless image spatial quality evaluator. In *Asilomar conference on signals, systems and computers*, 2011. 3
- [6] A. Mittal, R. Soundararajan, and A. C. Bovik. Making a “completely blind” image quality analyzer. *IEEE Signal Processing Letters*, 20(3), 2012. 3
- [7] Z. Wan, B. Zhang, D. Chen, and J. Liao. Bringing old films back to life. In *IEEE CVPR*, 2022. 1, 2, 3
- [8] Z. Wan, B. Zhang, D. Chen, P. Zhang, D. Chen, J. Liao, and F. Wen. Bringing old photos back to life. In *CVPR*, 2020. 1, 3
